# Supplementary material for: Coevolution-based prediction of key allosteric residues for protein function regulation
Source: eLife. 2023 Feb 17;12:e81850. doi: 10.7554/eLife.81850 (PMC9981151; doi:10.7554/eLife.81850)
Supplement: Figure 2—figure supplement 2—source data 1. [file elife-81850-fig2-figsupp2-data1.xlsx]

## Sheet: Sheet1
Source data for Figure 2-figure supplement 2
Figure 2-figure supplement 2A
Number of residue pairs	Accuracy
All	0.92
Top 200	0.72
Top 300	0.88
Top 400	0.96
Figure 2-figure supplement 2B
Number of residue pairs	Probability
	Top 1	Top 2	Top 3
All	0.56	0.76	0.96
Top 200	0.48	0.68	0.76
Top 300	0.52	0.76	0.76
Top 400	0.56	0.76	0.8
Figure 2-figure supplement 2C
All	Top 200	Top 300	Top 400
1.3	1.17	1.47	1.54
2.39	-0.17	0.22	0.58
2.45	2.06	2.11	2.06
3.03	1.91	2.05	2.12
3.06	0.78	0.93	1.1
0.63	0.46	0.58	0.7
1.49	1.1	1.28	1.44
2.16	1.9	1.78	1.73
1.49	0.95	1.04	1.13
0.11	-0.34	-0.25	-0.14
0.9	0.48	0.54	0.65
2.23	1.31	1.41	1.48
2.61	2.3	2.31	2.27
1.13	0.78	1.05	1.2
0.09	0.61	0.54	0.54
0.61	0.97	0.9	0.82
1.36	0.43	0.58	0.67
2.11	1.55	1.67	1.74
1.99	0.92	1.05	1.2
2.17	1.82	1.93	1.96
2.05	0.84	1	1.1
1.8	0.13	0.37	0.63
1.67	0.36	0.74	1.06
2.47	2.44	2.47	2.47
2.63	1.6	1.77	1.93
