# Supplementary material for: Coevolution-based prediction of key allosteric residues for protein function regulation
Source: eLife. 2023 Feb 17;12:e81850. doi: 10.7554/eLife.81850 (PMC9981151; doi:10.7554/eLife.81850)
Supplement: Figure 2—figure supplement 3—source data 1. [file elife-81850-fig2-figsupp3-data1.xlsx]

## Sheet: Sheet1
Source data for Figure 2-figure supplement 3
Figure 2-figure supplement 3
Allosteric	Random_mean	Random_std
335.53	309.418	14.2975
10.29	6.285	1.245
176.02	166.477	4.02513
100.01	83.9325	2.93389
76.85	56.5375	6.07674
247.66	241.065	2.33104
229.14	210.115	7.37697
460.79	416.972	21.9397
157.69	146.97	4.85299
164.6	156.778	3.88436
400.01	379.808	13.3344
1105.77	1072.19	17.8459
1373.04	1167.79	113.942
148.13	135.02	8.18321
252.95	209.197	8.80556
420.42	391.73	15.5918
342.57	326.518	10.0222
1011.55	855.678	108.414
220.15	191.513	12.8962
167.84	97.05	30.4162
168.1	161.005	4.32025
185.39	146.498	19.5646
374.17	185.965	88.0405
108.68	102.725	1.24043
60.42	53.875	4.36227
