# Supplementary material for: Coevolution-based prediction of key allosteric residues for protein function regulation
Source: eLife. 2023 Feb 17;12:e81850. doi: 10.7554/eLife.81850 (PMC9981151; doi:10.7554/eLife.81850)
Supplement: Figure 2—source data 1. [file elife-81850-fig2-data1.xlsx]

## Sheet: Sheet1
Source data for Figure 2
Figure 2A
Proteins	Length
Ha-Ras	166
Cdc4	169
MARTX	209
AR1	249
AR2	256
TEM-1	263
MurI	285
Bcr-Abl	293
PTP-1B	298
c-Abl	298
IGF-1R	304
FADK 1	304
CDK2	306
CHK1	322
CK2alpha	334
TRIP-5	348
RecA	349
MAPK14	360
MAPK8	370
PKB	446
HK4	455
CYP3A4	485
BCR-ABL1	495
AceK	578
Myosin-2	788
Figure 2B
Proteins	N	Neff
Ha-Ras	18578	2106
Cdc4	3009	102
MARTX	1249	253
AR1	316	108
AR2	318	102
TEM-1	2405	1709
MurI	6385	2950
Bcr-Abl	4143	1514
PTP-1B	4469	1583
c-Abl	1955	287
IGF-1R	3483	1349
FADK 1	16536	4539
CDK2	43677	18747
CHK1	1722	644
CK2alpha	11904	4803
TRIP-5	16707	3359
RecA	9129	1521
MAPK14	50122	16109
MAPK8	14115	5361
PKB	390	174
HK4	4246	1161
CYP3A4	1361	789
BCR-ABL1	4307	772
AceK	845	385
Myosin-2	516	122
Figure 2C
Proteins	Z-Score
Ha-Ras	0.61
Cdc4	2.47
MARTX	1.67
AR1	0.09
AR2	1.13
TEM-1	1.99
MurI	2.17
Bcr-Abl	2.05
PTP-1B	1.3
c-Abl	1.36
IGF-1R	2.23
FADK 1	2.61
CDK2	3.03
CHK1	0.9
CK2alpha	1.49
TRIP-5	2.16
RecA	2.11
MAPK14	2.39
MAPK8	0.63
PKB	3.06
HK4	2.45
CYP3A4	0.11
BCR-ABL1	1.49
AceK	2.63
Myosin-2	1.8
Figure 2D
Rank	Probability
Top 1	0.56
Top 2	0.76
Top 3	0.96
