# Supplementary material for: Coevolution-based prediction of key allosteric residues for protein function regulation
Source: eLife. 2023 Feb 17;12:e81850. doi: 10.7554/eLife.81850 (PMC9981151; doi:10.7554/eLife.81850)
Supplement: Figure 3—figure supplement 1—source data 1. [file elife-81850-fig3-figsupp1-data1.xlsx]

## Sheet: Sheet1
Source data for Figure 3-figure supplement 1
Figure 3-figure supplement 1
cutoff0.5	cutoff0.6	cutoff0.7	cutoff0.8	cutoff0.9	cutoff1.0
0.190476	0.142857	0.142857	0.142857	0.0952381	0.0952381
0.0689655	0.0689655	0.0689655	0.0689655	0.0689655	0.0689655
0.282051	0.282051	0.282051	0.230769	0.230769	0.230769
0.136364	0.136364	0.136364	0.136364	0.136364	0.136364
0.222222	0.222222	0.222222	0.222222	0.185185	0.185185
0.23913	0.217391	0.152174	0.152174	0.152174	0.152174
0.324324	0.297297	0.297297	0.297297	0.297297	0.297297
0.276596	0.234043	0.212766	0.212766	0.148936	0.106383
0.16	0.12	0.12	0.12	0.12	0.12
0.228571	0.228571	0.2	0.2	0.171429	0.171429
0.254902	0.235294	0.156863	0.156863	0.156863	0.137255
0.253333	0.226667	0.186667	0.186667	0.173333	0.146667
0.291667	0.25	0.229167	0.229167	0.166667	0.104167
0.25	0.208333	0.208333	0.125	0.125	0.125
0.28	0.24	0.24	0.2	0.2	0.2
0.25	0.232143	0.232143	0.214286	0.214286	0.196429
0.260274	0.246575	0.219178	0.191781	0.178082	0.164384
0.25	0.227273	0.204545	0.204545	0.159091	0.159091
0.3	0.3	0.3	0.3	0.266667	0.266667
0.395349	0.186047	0.186047	0.162791	0.162791	0.116279
0.272727	0.218182	0.2	0.181818	0.163636	0.145455
0.24	0.24	0.24	0.2	0.2	0.2
0.227273	0.181818	0.181818	0.159091	0.159091	0.159091
0.287671	0.273973	0.246575	0.246575	0.205479	0.205479
0.295775	0.295775	0.28169	0.267606	0.253521	0.197183
