# Supplementary material for: Coevolution-based prediction of key allosteric residues for protein function regulation
Source: eLife. 2023 Feb 17;12:e81850. doi: 10.7554/eLife.81850 (PMC9981151; doi:10.7554/eLife.81850)
Supplement: Figure 3—figure supplement 3—source data 1. [file elife-81850-fig3-figsupp3-data1.xlsx]

## Sheet: Sheet1
Source data for Figure 3-figure supplement 3
Figure 3-figure supplement 3
Proteins	Ratio_mean
	Less1L	1L	2L	3L	4L	5L	6L	7L	8L	9L	10L	11L	12L	13L	14L
Ha-Ras	0.22	0.33	0.67	0.67	0.78	0	0	0	0	0	0	0	0	0	0
TRIP-5	0.47	0.58	0.75	0.78	0.72	0.83	0.83	0.64	0.78	0.67	0.64	0	0	0	0
CDK2	0.36	0.45	0.42	0.48	0.51	0.42	0.55	0.61	0.58	0.39	0.45	0	0	0	0
CK2alpha	0.2	0	0.27	0.33	0.13	0.33	0.67	0.4	0.67	0	0	0	0	0	0
MAPK8	0.26	0.26	0.29	0.41	0.44	0.44	0.37	0.44	0.52	0.26	0	0	0	0	0
MAPK14	0.52	0.48	0.67	0.63	0.52	0.6	0.59	0.56	0.6	0.63	0.71	0.7	0	0	0
FADK 1	0.31	0.43	0.59	0.69	0.64	0.62	0.59	0.59	0.57	0.57	0.71	0.72	0.62	0.66	0.84
Proteins	Ratio_std
	Less1L	1L	2L	3L	4L	5L	6L	7L	8L	9L	10L	11L	12L	13L	14L
Ha-Ras	0.16	0	0	0	0.16	0	0	0	0	0	0	0	0	0	0
TRIP-5	0.08	0	0	0.04	0.04	0.07	0	0.04	0.04	0.07	0.1	0	0	0	0
CDK2	0.13	0.08	0.04	0.05	0.09	0.04	0.08	0.04	0.04	0.12	0.08	0	0	0	0
CK2alpha	0.16	0	0.19	0.09	0.09	0.09	0.19	0	0.09	0	0	0	0	0	0
MAPK8	0.1	0.05	0.1	0.11	0.09	0.09	0.05	0	0.06	0.1	0	0	0	0	0
MAPK14	0.11	0.06	0.09	0.1	0.14	0.05	0.14	0.18	0.05	0.05	0.14	0.19	0	0	0
FADK 1	0.09	0.16	0.03	0.03	0	0.03	0.03	0.03	0	0.06	0	0.07	0.03	0.03	0.07
