# Supplementary material for: Coevolution-based prediction of key allosteric residues for protein function regulation
Source: eLife. 2023 Feb 17;12:e81850. doi: 10.7554/eLife.81850 (PMC9981151; doi:10.7554/eLife.81850)
Supplement: Figure 3—source data 1. [file elife-81850-fig3-data1.xlsx]

## Sheet: Sheet1
Source data for Figure 3
Figure 3
Proteins	All_residues	Key_residues
Ha-Ras	21	3
Cdc4	29	2
MARTX	39	9
AR1	22	3
AR2	27	6
TEM-1	46	7
MurI	37	11
Bcr-Abl	47	10
PTP-1B	25	3
c-Abl	35	7
IGF-1R	51	8
FADK 1	75	14
CDK2	48	11
CHK1	24	3
CK2alpha	25	5
TRIP-5	56	12
RecA	73	14
MAPK14	44	9
MAPK8	30	9
PKB	43	7
HK4	55	10
CYP3A4	25	5
BCR-ABL1	44	7
AceK	73	18
Myosin-2	71	19
