# Supplementary material for: Coevolution-based prediction of key allosteric residues for protein function regulation
Source: eLife. 2023 Feb 17;12:e81850. doi: 10.7554/eLife.81850 (PMC9981151; doi:10.7554/eLife.81850)
Supplement: Figure 5—source data 1. [file elife-81850-fig5-data1.xlsx]

## Sheet: Sheet1
Source data for Figure 5
Figure 5B
Key allo-residues	Z-score
I65	2.305
F150	1.56599
Y149	0.826983
Q152	0.826983
P153	0.826983
T154	0.826983
Figure 5C
Key allo-residues	Z-score
D306	2.96695
S409	2.32164
L302	1.67633
A347	1.03102
L353	0.815912
