# Supplementary material for: Coevolution-based prediction of key allosteric residues for protein function regulation
Source: eLife. 2023 Feb 17;12:e81850. doi: 10.7554/eLife.81850 (PMC9981151; doi:10.7554/eLife.81850)
Supplement: Figure 6—source data 1. [file elife-81850-fig6-data1.xlsx]

## Sheet: Sheet1
Source data for Figure 6
Figure 6A
Key allo-residues	Z-score
P133	3.98
L73	3.94
A225	3.04
S201	3.04
S150	3.04
E188	3
E269	2.72
S47	2.51
N169	2.33
S250	2.31
V78	2.31
M72	2.31
P152	2.25
S67	2.25
S243	2.21
L140	2.13
T238	2.05
V110	2.05
Q191	1.99
K290	1.95
L228	1.93
P218	1.88
S184	1.86
I66	1.82
P260	1.8
D187	1.76
A305	1.58
G44	1.54
A146	1.52
G60	1.52
T186	1.46
R249	1.44
T244	1.44
S153	1.44
V37	1.42
R309	1.36
W113	1.34
S195	1.3
L90	1.21
F205	1.19
L204	1.15
P63	1.09
Q112	1.01
I255	0.99
L167	0.99
L144	0.97
L128	0.97
T88	0.97
A8	0.97
Y203	0.95
S161	0.93
I87	0.93
Figure 6B
Key allo-residues	Z-score
L86	2.17
A9	2.03
R44	1.89
Q89	1.89
E57	1.61
E12	1.61
L40	1.33
D69	1.33
R58	1.18
N5	1.18
